# Supplementary material
Source: PubMed Central journal article supplement (PMC6398150)
Supplement: jm8b01568_si_004.pdf [file jm8b01568_si_004.pdf]

## Supporting Information

### Substrate specific inhibition constants for phospholipase A<sub>2</sub> acting on unique phospholipid substrates in mixed micelles and membranes using lipidomics

Varnavas D. Mouchlis\*, Aaron Armando and Edward A. Dennis\*

Department of Chemistry and Biochemistry and Department of Pharmacology, School of Medicine, University of California, San Diego, La Jolla, California 92093-0601

Corresponding Authors

\*V.D.M.: e-mail, [vmouchlis@gmail.com](mailto:vmouchlis@gmail.com).

\*E.A.D.: e-mail, [edennis@ucsd.edu](mailto:edennis@ucsd.edu); phone, +1 858 534 3055.

#### Table of Contents

|               |    |
|---------------|----|
| Fig. S1 ..... | S2 |
| Fig. S2 ..... | S2 |
| Fig. S3 ..... | S2 |

Two additional dose-response inhibition curves for each of the lipidomics assays (b and c) were performed independently from those shown in Fig. 2A and B – 4A and B and are provided in Fig. S1A and B – S3A and B. The results of all three determinations are given in Table 2.

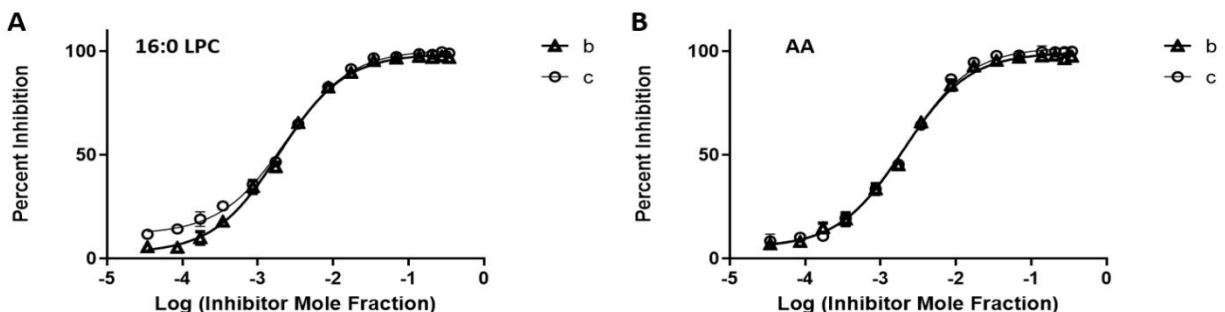

**Figure S1.** Dose-response inhibition curves for pyrrophenone using PAPC substrate. (A) The activity of cPLA<sub>2</sub> was measured by detecting 16:0 LPC in positive ion mode and (B) by detecting free arachidonic acid in negative ion mode.

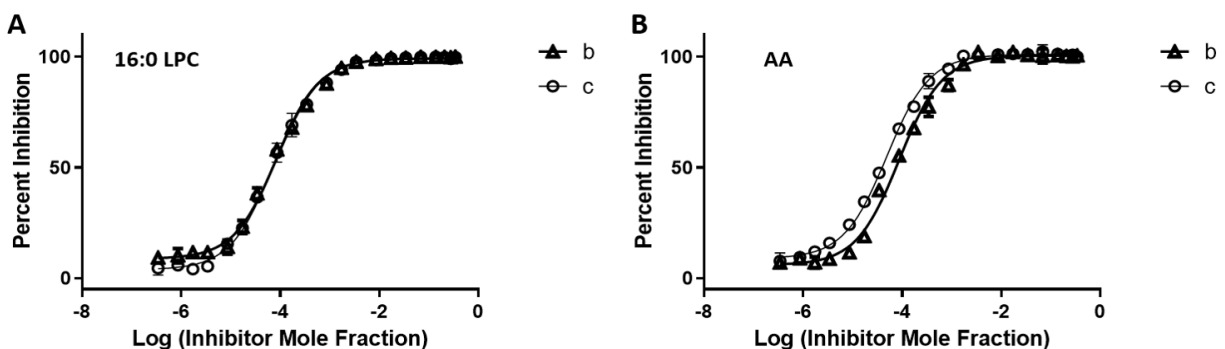

**Figure S2.** Dose-response inhibition curves for OTFP using PAPC substrate. (A) The activity of iPLA<sub>2</sub> was measured by detecting 16:0 LPC in positive ion mode and (B) by detecting free arachidonic acid in negative ion mode.

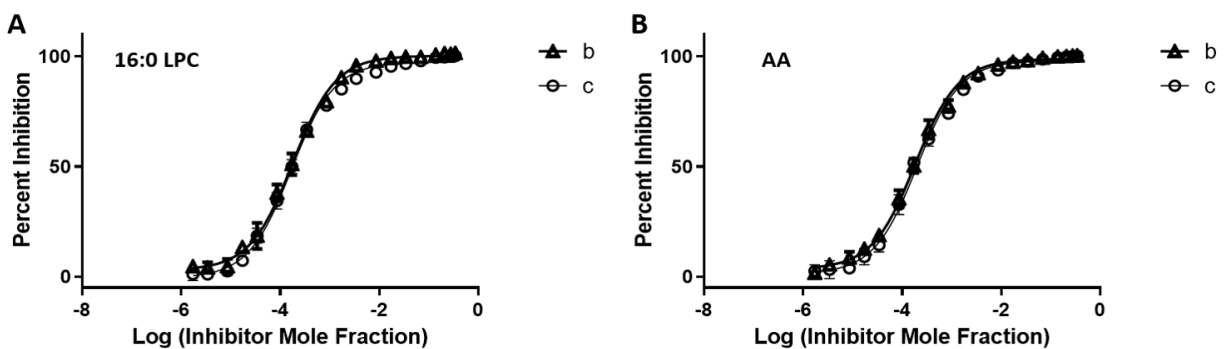

**Figure S3.** Dose-response inhibition curves for Ly315920 using PAPC substrate. (A) The activity of sPLA<sub>2</sub> was measured by detecting 16:0 LPC in positive ion mode and (B) by detecting free arachidonic acid in negative ion mode.
